# Supplementary material for: Structure and NMR assignment in calcined and as-synthesized forms of AlPO-14: a combined study by first-principles calculations and high-resolution 27Al–31P MAS NMR correlation
Source: Royal Society of Chemistry journal article supplement (doi:10.1039/b805681a), 2008-01-01

## Supplementary Material

### Calcined-dehydrated AlPO-14

i. Atomic positions ( $x, y, z$  fractional co-ordinates) of all atoms in the unit cell before any optimization (Broach)

|           |          |           |         |           |          |           |
|-----------|----------|-----------|---------|-----------|----------|-----------|
| Unit cell | $a$      | 9.70413 Å | $b$     | 9.73611 Å | $c$      | 10.2018 Å |
|           | $\alpha$ | 77.811°   | $\beta$ | 77.504°   | $\gamma$ | 87.691°   |

| Atom type | x      | y      | z      |
|-----------|--------|--------|--------|
| O         | 0.0766 | 0.4368 | 0.8348 |
| O         | 0.9234 | 0.5632 | 0.1652 |
| O         | 0.3024 | 0.3126 | 0.8628 |
| O         | 0.6976 | 0.6874 | 0.1372 |
| O         | 0.7757 | 0.2329 | 0.9823 |
| O         | 0.2243 | 0.7671 | 0.0177 |
| O         | 0.4396 | 0.0642 | 0.8307 |
| O         | 0.5604 | 0.9358 | 0.1693 |
| O         | 0.4431 | 0.8367 | 0.7641 |
| O         | 0.5569 | 0.1633 | 0.2359 |
| O         | 0.2989 | 0.5607 | 0.8480 |
| O         | 0.7011 | 0.4393 | 0.1520 |
| O         | 0.0245 | 0.3297 | 0.3318 |
| O         | 0.9755 | 0.6703 | 0.6682 |
| O         | 0.8582 | 0.1495 | 0.4864 |
| O         | 0.1418 | 0.8505 | 0.5136 |
| O         | 0.9407 | 0.9216 | 0.6755 |
| O         | 0.0593 | 0.0784 | 0.3245 |
| O         | 0.1609 | 0.4094 | 0.0595 |
| O         | 0.8391 | 0.5906 | 0.9405 |
| O         | 0.8659 | 0.1898 | 0.2366 |
| O         | 0.1341 | 0.8102 | 0.7634 |
| O         | 0.6009 | 0.2911 | 0.8439 |
| O         | 0.3991 | 0.7089 | 0.1561 |
| O         | 0.8048 | 0.1556 | 0.7691 |
| O         | 0.1952 | 0.8444 | 0.2309 |
| O         | 0.3519 | 0.0299 | 0.3184 |
| O         | 0.6481 | 0.9701 | 0.6816 |
| O         | 0.4183 | 0.1391 | 0.0786 |
| O         | 0.5817 | 0.8609 | 0.9214 |
| O         | 0.8210 | 0.4141 | 0.7623 |
| O         | 0.1790 | 0.5859 | 0.2377 |
| Al        | 0.2730 | 0.7425 | 0.8445 |
| Al        | 0.7270 | 0.2575 | 0.1555 |

Supplementary Material (ESI) for *PCCP*  
This journal is © the Owner Societies 2008

|    |        |        |        |
|----|--------|--------|--------|
| Al | 0.4322 | 0.2004 | 0.908  |
| Al | 0.5678 | 0.7996 | 0.092  |
| Al | 0.8141 | 0.0506 | 0.6558 |
| Al | 0.1859 | 0.9494 | 0.3442 |
| Al | 0.0699 | 0.4732 | 0.2015 |
| Al | 0.9301 | 0.5268 | 0.7985 |
| P  | 0.5246 | 0.9351 | 0.7996 |
| P  | 0.4754 | 0.0649 | 0.2004 |
| P  | 0.2010 | 0.4282 | 0.9010 |
| P  | 0.7990 | 0.5718 | 0.0990 |
| P  | 0.9511 | 0.1884 | 0.3437 |
| P  | 0.0489 | 0.8116 | 0.6563 |
| P  | 0.7520 | 0.2740 | 0.8400 |
| P  | 0.2480 | 0.7260 | 0.1600 |

ii. New atomic positions ( $x$ ,  $y$ ,  $z$  fractional co-ordinates) of all atoms in the unit cell after optimization with CASTEP with a fixed unit cell size (Optfix)

|           |          |           |         |           |          |           |
|-----------|----------|-----------|---------|-----------|----------|-----------|
| Unit cell | $a$      | 9.70413 Å | $b$     | 9.73611 Å | $c$      | 10.2018 Å |
|           | $\alpha$ | 77.811°   | $\beta$ | 77.504°   | $\gamma$ | 87.691°   |

| Atom type | x        | y        | z        |
|-----------|----------|----------|----------|
| O         | 0.076732 | 0.435454 | 0.836396 |
| O         | 0.923268 | 0.564546 | 0.163604 |
| O         | 0.291526 | 0.300515 | 0.866759 |
| O         | 0.708474 | 0.699485 | 0.133241 |
| O         | 0.772641 | 0.242078 | 0.984688 |
| O         | 0.227359 | 0.757922 | 0.015312 |
| O         | 0.436560 | 0.054421 | 0.825396 |
| O         | 0.563440 | 0.945579 | 0.174604 |
| O         | 0.432223 | 0.822600 | 0.761646 |
| O         | 0.567777 | 0.177400 | 0.238354 |
| O         | 0.296276 | 0.560223 | 0.841916 |
| O         | 0.703724 | 0.439777 | 0.158084 |
| O         | 0.023849 | 0.326936 | 0.333980 |
| O         | 0.976151 | 0.673064 | 0.666020 |
| O         | 0.846427 | 0.154206 | 0.484720 |
| O         | 0.153573 | 0.845794 | 0.515280 |
| O         | 0.943148 | 0.928550 | 0.667979 |
| O         | 0.056852 | 0.071450 | 0.332021 |
| O         | 0.159423 | 0.408678 | 0.057143 |
| O         | 0.840577 | 0.591322 | 0.942857 |
| O         | 0.866703 | 0.199718 | 0.231678 |
| O         | 0.133297 | 0.800282 | 0.768322 |
| O         | 0.589267 | 0.292627 | 0.840321 |
| O         | 0.410733 | 0.707373 | 0.159679 |
| O         | 0.805782 | 0.153942 | 0.769639 |
| O         | 0.194218 | 0.846058 | 0.230361 |

Supplementary Material (ESI) for *PCCP*  
This journal is © the Owner Societies 2008

|    |          |          |          |
|----|----------|----------|----------|
| O  | 0.352217 | 0.029209 | 0.328710 |
| O  | 0.647783 | 0.970791 | 0.671290 |
| O  | 0.411579 | 0.140122 | 0.080592 |
| O  | 0.588421 | 0.859878 | 0.919408 |
| O  | 0.821544 | 0.412563 | 0.757049 |
| O  | 0.178456 | 0.587437 | 0.242951 |
| Al | 0.272921 | 0.738169 | 0.844974 |
| Al | 0.727079 | 0.261831 | 0.155026 |
| Al | 0.432242 | 0.197184 | 0.903637 |
| Al | 0.567758 | 0.802816 | 0.096363 |
| Al | 0.811635 | 0.050998 | 0.648712 |
| Al | 0.188365 | 0.949002 | 0.351288 |
| Al | 0.071746 | 0.471621 | 0.200681 |
| Al | 0.928254 | 0.528379 | 0.799319 |
| P  | 0.526239 | 0.927003 | 0.794744 |
| P  | 0.473761 | 0.072997 | 0.205256 |
| P  | 0.205384 | 0.427106 | 0.901031 |
| P  | 0.794616 | 0.572894 | 0.098969 |
| P  | 0.948705 | 0.187741 | 0.345844 |
| P  | 0.051295 | 0.812259 | 0.654156 |
| P  | 0.747266 | 0.275147 | 0.837896 |
| P  | 0.252734 | 0.724853 | 0.162104 |

iii. New atomic positions (x, y, z fractional co-ordinates) of all atoms in the unit cell after optimization with CASTEP with a variable unit cell (Opt)

|           |          |            |          |            |          |             |
|-----------|----------|------------|----------|------------|----------|-------------|
| Unit cell | <i>a</i> | 9.786066 Å | <i>b</i> | 9.840522 Å | <i>c</i> | 10.311201 Å |
|           | $\alpha$ | 77.586741° | $\beta$  | 77.461648° | $\gamma$ | 87.592192°  |

| Atom type | x        | y        | z        |
|-----------|----------|----------|----------|
| O         | 0.081321 | 0.437902 | 0.836391 |
| O         | 0.918679 | 0.562098 | 0.163609 |
| O         | 0.298621 | 0.309475 | 0.868113 |
| O         | 0.701379 | 0.690525 | 0.131887 |
| O         | 0.775912 | 0.235817 | 0.985977 |
| O         | 0.224088 | 0.764183 | 0.014023 |
| O         | 0.439870 | 0.060187 | 0.826437 |
| O         | 0.560130 | 0.939813 | 0.173563 |
| O         | 0.430559 | 0.830684 | 0.764828 |
| O         | 0.569441 | 0.169316 | 0.235172 |
| O         | 0.294125 | 0.566754 | 0.846382 |
| O         | 0.705875 | 0.433246 | 0.153618 |
| O         | 0.020504 | 0.326911 | 0.329590 |
| O         | 0.979496 | 0.673089 | 0.670410 |
| O         | 0.855842 | 0.149293 | 0.486950 |
| O         | 0.144158 | 0.850707 | 0.513050 |
| O         | 0.939074 | 0.924629 | 0.675335 |
| O         | 0.060926 | 0.075371 | 0.324665 |

Supplementary Material (ESI) for *PCCP*  
This journal is © the Owner Societies 2008

|    |          |          |          |
|----|----------|----------|----------|
| O  | 0.158349 | 0.410408 | 0.056597 |
| O  | 0.841651 | 0.589592 | 0.943403 |
| O  | 0.861346 | 0.194894 | 0.238131 |
| O  | 0.138654 | 0.805106 | 0.761869 |
| O  | 0.594129 | 0.292746 | 0.843329 |
| O  | 0.405871 | 0.707254 | 0.156671 |
| O  | 0.808675 | 0.157291 | 0.767983 |
| O  | 0.191325 | 0.842709 | 0.232017 |
| O  | 0.351241 | 0.025679 | 0.323419 |
| O  | 0.648759 | 0.974321 | 0.676581 |
| O  | 0.414655 | 0.138585 | 0.078472 |
| O  | 0.585345 | 0.861415 | 0.921528 |
| O  | 0.825447 | 0.411197 | 0.763592 |
| O  | 0.174553 | 0.588803 | 0.236408 |
| Al | 0.272596 | 0.744415 | 0.845030 |
| Al | 0.727404 | 0.255585 | 0.154970 |
| Al | 0.435839 | 0.201536 | 0.903873 |
| Al | 0.564161 | 0.798464 | 0.096127 |
| Al | 0.813563 | 0.051364 | 0.651791 |
| Al | 0.186437 | 0.948636 | 0.348209 |
| Al | 0.068339 | 0.471697 | 0.198232 |
| Al | 0.931661 | 0.528303 | 0.801768 |
| P  | 0.526145 | 0.931907 | 0.797546 |
| P  | 0.473855 | 0.068093 | 0.202454 |
| P  | 0.207808 | 0.432023 | 0.902020 |
| P  | 0.792192 | 0.567977 | 0.097980 |
| P  | 0.949712 | 0.186181 | 0.345272 |
| P  | 0.050288 | 0.813819 | 0.654728 |
| P  | 0.751057 | 0.274167 | 0.840296 |
| P  | 0.248943 | 0.725833 | 0.159704 |

*ipa-AIPO-14*

i. Atomic positions (x, y, z fractional co-ordinates) of all atoms in the unit cell after initial optimization with CASTEP of only <sup>1</sup>H positions with a fixed unit cell size (Broach)

|           |          |          |          |          |          |           |
|-----------|----------|----------|----------|----------|----------|-----------|
| Unit cell | <i>a</i> | 9.6599 Å | <i>b</i> | 9.6639 Å | <i>c</i> | 10.6181 Å |
|           | $\alpha$ | 77.7194° | $\beta$  | 74.14°   | $\gamma$ | 88.983°   |

| Atom type | x        | y        | z        |
|-----------|----------|----------|----------|
| H         | 0.272920 | 0.033824 | 0.038837 |
| H         | 0.727080 | 0.966176 | 0.961163 |
| H         | 0.469899 | 0.293936 | 0.228914 |
| H         | 0.530101 | 0.706064 | 0.771086 |
| H         | 0.292931 | 0.276106 | 0.289566 |

Supplementary Material (ESI) for *PCCP*  
This journal is © the Owner Societies 2008

---

|   |          |          |           |
|---|----------|----------|-----------|
| H | 0.707069 | 0.723894 | 0.710434  |
| H | 0.373313 | 0.439252 | 0.238217  |
| H | 0.626687 | 0.560748 | 0.761783  |
| H | 0.490015 | 0.411597 | 0.396092  |
| H | 0.509985 | 0.588403 | 0.603908  |
| H | 0.251279 | 0.502101 | 0.443859  |
| H | 0.748721 | 0.497899 | 0.556141  |
| H | 0.178298 | 0.332599 | 0.535598  |
| H | 0.821702 | 0.667401 | 0.464402  |
| H | 0.301614 | 0.420151 | 0.589004  |
| H | 0.698386 | 0.579849 | 0.410996  |
| H | 0.532917 | 0.158373 | 0.427911  |
| H | 0.467083 | 0.841627 | 0.572089  |
| H | 0.478496 | 0.224108 | 0.577184  |
| H | 0.521504 | 0.775892 | 0.422816  |
| H | 0.356324 | 0.12126  | 0.535870  |
| H | 0.643676 | 0.87874  | 0.464130  |
| H | 0.813401 | 0.835708 | 0.111364  |
| H | 0.186599 | 0.164292 | 0.888636  |
| H | 0.955212 | 0.862235 | -0.005602 |
| H | 0.044788 | 0.137765 | 1.005602  |
| C | 0.396000 | 0.336000 | 0.423000  |
| C | 0.604000 | 0.664000 | 0.577000  |
| C | 0.278000 | 0.400000 | 0.499000  |
| C | 0.722000 | 0.600000 | 0.501000  |
| C | 0.443000 | 0.204000 | 0.493000  |
| C | 0.557000 | 0.796000 | 0.507000  |
| N | 0.382000 | 0.336000 | 0.288000  |
| N | 0.618000 | 0.664000 | 0.712000  |
| O | 0.559000 | 0.832000 | 0.164000  |
| O | 0.441000 | 0.168000 | 0.836000  |
| O | 0.617000 | 0.603000 | 0.123000  |
| O | 0.383000 | 0.397000 | 0.877000  |
| O | 0.840000 | 0.195000 | 0.992000  |
| O | 0.160000 | 0.805000 | 0.008000  |
| O | 0.093000 | 0.452000 | 0.847000  |
| O | 0.907000 | 0.548000 | 0.153000  |
| O | 0.912000 | 0.381000 | 0.748000  |
| O | 0.088000 | 0.619000 | 0.252000  |
| O | 0.368000 | 0.655000 | 0.165000  |
| O | 0.632000 | 0.345000 | 0.835000  |
| O | 0.364000 | 0.002000 | 0.289000  |
| O | 0.636000 | 0.998000 | 0.711000  |
| O | 0.168000 | 0.898000 | 0.502000  |
| O | 0.832000 | 0.102000 | 0.498000  |
| O | 0.350000 | 0.965000 | 0.052000  |
| O | 0.650000 | 0.035000 | 0.948000  |
| O | 0.552000 | 0.790000 | 0.939000  |
| O | 0.448000 | 0.210000 | 0.061000  |
| O | 0.149000 | 0.864000 | 0.278000  |
| O | 0.851000 | 0.136000 | 0.722000  |
| O | 0.723000 | 0.334000 | 0.149000  |

---

Supplementary Material (ESI) for *PCCP*  
 This journal is © the Owner Societies 2008

|    |          |          |          |
|----|----------|----------|----------|
| O  | 0.277000 | 0.666000 | 0.851000 |
| O  | 0.883000 | 0.144000 | 0.217000 |
| O  | 0.117000 | 0.856000 | 0.783000 |
| O  | 0.025000 | 0.638000 | 0.684000 |
| O  | 0.975000 | 0.362000 | 0.316000 |
| O  | 0.848000 | 0.554000 | 0.904000 |
| O  | 0.152000 | 0.446000 | 0.096000 |
| O  | 0.639000 | 0.073000 | 0.200000 |
| O  | 0.361000 | 0.927000 | 0.800000 |
| O  | 0.121000 | 0.102000 | 0.325000 |
| O  | 0.879000 | 0.898000 | 0.675000 |
| O  | 0.850000 | 0.855000 | 0.014000 |
| O  | 0.150000 | 0.145000 | 0.986000 |
| Al | 0.222000 | 0.769000 | 0.157000 |
| Al | 0.778000 | 0.231000 | 0.843000 |
| Al | 0.775000 | 0.516000 | 0.079000 |
| Al | 0.225000 | 0.484000 | 0.921000 |
| Al | 0.046000 | 0.823000 | 0.659000 |
| Al | 0.954000 | 0.177000 | 0.341000 |
| Al | 0.502000 | 0.021000 | 0.127000 |
| Al | 0.498000 | 0.979000 | 0.873000 |
| P  | 0.962000 | 0.502000 | 0.797000 |
| P  | 0.038000 | 0.498000 | 0.203000 |
| P  | 0.519000 | 0.726000 | 0.093000 |
| P  | 0.481000 | 0.274000 | 0.907000 |
| P  | 0.201000 | 0.964000 | 0.348000 |
| P  | 0.799000 | 0.036000 | 0.652000 |
| P  | 0.768000 | 0.183000 | 0.142000 |
| P  | 0.232000 | 0.817000 | 0.858000 |

ii. New atomic positions ( $x$ ,  $y$ ,  $z$  fractional co-ordinates) of all atoms in the unit cell after optimization with CASTEP with a fixed unit cell size (Optfix)

|           |          |          |         |          |          |           |
|-----------|----------|----------|---------|----------|----------|-----------|
| Unit cell | $a$      | 9.6599 Å | $b$     | 9.6639 Å | $c$      | 10.6181 Å |
|           | $\alpha$ | 77.7194° | $\beta$ | 74.14°   | $\gamma$ | 88.983°   |

| Atom type | x        | y        | z        |
|-----------|----------|----------|----------|
| H         | 0.285736 | 0.027463 | 0.038189 |
| H         | 0.714264 | 0.972537 | 0.961811 |
| H         | 0.463541 | 0.314079 | 0.222614 |
| H         | 0.536459 | 0.685921 | 0.777386 |
| H         | 0.289924 | 0.277783 | 0.301784 |
| H         | 0.710076 | 0.722217 | 0.698216 |
| H         | 0.353115 | 0.448644 | 0.239583 |
| H         | 0.646885 | 0.551356 | 0.760417 |
| H         | 0.495672 | 0.430562 | 0.392275 |
| H         | 0.504328 | 0.569438 | 0.607725 |

Supplementary Material (ESI) for *PCCP*  
This journal is © the Owner Societies 2008

---

|   |          |          |          |
|---|----------|----------|----------|
| H | 0.243531 | 0.516811 | 0.454891 |
| H | 0.756470 | 0.483189 | 0.545109 |
| H | 0.176746 | 0.339916 | 0.531856 |
| H | 0.823254 | 0.660084 | 0.468144 |
| H | 0.291057 | 0.423979 | 0.599668 |
| H | 0.708943 | 0.576021 | 0.400332 |
| H | 0.531356 | 0.166716 | 0.423777 |
| H | 0.468644 | 0.833284 | 0.576223 |
| H | 0.469732 | 0.219311 | 0.579555 |
| H | 0.530268 | 0.780689 | 0.420445 |
| H | 0.348625 | 0.134365 | 0.519163 |
| H | 0.651375 | 0.865635 | 0.480837 |
| H | 0.792675 | 0.841445 | 0.114768 |
| H | 0.207325 | 0.158555 | 0.885232 |
| H | 0.944050 | 0.850303 | 0.010250 |
| H | 0.055950 | 0.149696 | 0.989750 |
| C | 0.402762 | 0.355223 | 0.420330 |
| C | 0.597238 | 0.644777 | 0.579670 |
| C | 0.271144 | 0.413047 | 0.505399 |
| C | 0.728856 | 0.586954 | 0.494601 |
| C | 0.440780 | 0.210721 | 0.488496 |
| C | 0.559220 | 0.789279 | 0.511504 |
| N | 0.375430 | 0.348505 | 0.288032 |
| N | 0.624570 | 0.651495 | 0.711968 |
| O | 0.552019 | 0.834611 | 0.165000 |
| O | 0.447981 | 0.165389 | 0.835000 |
| O | 0.612749 | 0.596529 | 0.112326 |
| O | 0.387251 | 0.403471 | 0.887674 |
| O | 0.852160 | 0.191266 | 0.991883 |
| O | 0.147840 | 0.808734 | 0.008117 |
| O | 0.108577 | 0.447924 | 0.834633 |
| O | 0.891423 | 0.552076 | 0.165367 |
| O | 0.913167 | 0.379426 | 0.747573 |
| O | 0.086832 | 0.620574 | 0.252427 |
| O | 0.362882 | 0.666864 | 0.151918 |
| O | 0.637118 | 0.333136 | 0.848082 |
| O | 0.360329 | 0.010190 | 0.295209 |
| O | 0.639671 | 0.989809 | 0.704791 |
| O | 0.172420 | 0.889315 | 0.499794 |
| O | 0.827580 | 0.110685 | 0.500206 |
| O | 0.359542 | 0.956551 | 0.051164 |
| O | 0.640458 | 0.043449 | 0.948836 |
| O | 0.546972 | 0.787464 | 0.938453 |
| O | 0.453028 | 0.212536 | 0.061547 |
| O | 0.143823 | 0.876993 | 0.276517 |
| O | 0.856177 | 0.123007 | 0.723483 |
| O | 0.714987 | 0.336714 | 0.149891 |
| O | 0.285013 | 0.663286 | 0.850109 |
| O | 0.883973 | 0.153643 | 0.219907 |
| O | 0.116027 | 0.846357 | 0.780093 |
| O | 0.014933 | 0.630669 | 0.674818 |
| O | 0.985068 | 0.369331 | 0.325183 |

---

Supplementary Material (ESI) for *PCCP*  
This journal is © the Owner Societies 2008

|    |          |          |          |
|----|----------|----------|----------|
| O  | 0.861326 | 0.544120 | 0.907610 |
| O  | 0.138675 | 0.455880 | 0.092390 |
| O  | 0.646103 | 0.080404 | 0.196470 |
| O  | 0.353897 | 0.919596 | 0.803530 |
| O  | 0.117654 | 0.109115 | 0.348099 |
| O  | 0.882347 | 0.890885 | 0.651901 |
| O  | 0.840217 | 0.850451 | 0.019535 |
| O  | 0.159783 | 0.149550 | 0.980465 |
| Al | 0.209633 | 0.773614 | 0.156563 |
| Al | 0.790367 | 0.226386 | 0.843437 |
| Al | 0.774161 | 0.514186 | 0.077945 |
| Al | 0.225839 | 0.485814 | 0.922055 |
| Al | 0.048300 | 0.814575 | 0.651545 |
| Al | 0.951701 | 0.185425 | 0.348455 |
| Al | 0.499346 | 0.024668 | 0.133219 |
| Al | 0.500654 | 0.975332 | 0.866781 |
| P  | 0.974151 | 0.499085 | 0.790957 |
| P  | 0.025849 | 0.500915 | 0.209043 |
| P  | 0.521371 | 0.725950 | 0.089146 |
| P  | 0.478629 | 0.274050 | 0.910854 |
| P  | 0.201030 | 0.970116 | 0.353050 |
| P  | 0.798970 | 0.029884 | 0.646950 |
| P  | 0.771770 | 0.187706 | 0.140668 |
| P  | 0.228230 | 0.812294 | 0.859332 |

iii. New atomic positions ( $x, y, z$  fractional co-ordinates) of all atoms in the unit cell after optimization with CASTEP with a variable unit cell (Opt)

|           |          |            |         |            |          |             |
|-----------|----------|------------|---------|------------|----------|-------------|
| Unit cell | $a$      | 9.687163 Å | $b$     | 9.740585 Å | $c$      | 10.719979 Å |
|           | $\alpha$ | 75.223602° | $\beta$ | 74.286875° | $\gamma$ | 89.023471°  |

| Atom type | x        | y        | z        |
|-----------|----------|----------|----------|
| H         | 0.286543 | 0.025772 | 0.037092 |
| H         | 0.713475 | 0.974208 | 0.962909 |
| H         | 0.465344 | 0.313306 | 0.225027 |
| H         | 0.534661 | 0.686694 | 0.774970 |
| H         | 0.291159 | 0.275170 | 0.302331 |
| H         | 0.708849 | 0.724834 | 0.697669 |
| H         | 0.355184 | 0.447452 | 0.236915 |
| H         | 0.644822 | 0.552553 | 0.763081 |
| H         | 0.496219 | 0.427439 | 0.389027 |
| H         | 0.503789 | 0.572566 | 0.610970 |
| H         | 0.245877 | 0.512011 | 0.448849 |
| H         | 0.754126 | 0.487994 | 0.551147 |
| H         | 0.177873 | 0.334169 | 0.532524 |
| H         | 0.822136 | 0.665837 | 0.467472 |
| H         | 0.294467 | 0.418464 | 0.594996 |



Supplementary Material (ESI) for *PCCP*  
This journal is © the Owner Societies 2008

---

|   |          |          |          |
|---|----------|----------|----------|
| H | 0.705531 | 0.581537 | 0.404989 |
| H | 0.531217 | 0.163905 | 0.427474 |
| H | 0.468793 | 0.836095 | 0.572522 |
| H | 0.470943 | 0.213973 | 0.580686 |
| H | 0.529055 | 0.786025 | 0.419297 |
| H | 0.349120 | 0.128391 | 0.524595 |
| H | 0.650887 | 0.871615 | 0.475401 |
| H | 0.798373 | 0.839599 | 0.113919 |
| H | 0.201615 | 0.160402 | 0.886095 |
| H | 0.946156 | 0.852811 | 0.005307 |
| H | 0.053818 | 0.147194 | 0.994689 |
| C | 0.403271 | 0.351173 | 0.419401 |
| C | 0.596739 | 0.648834 | 0.580589 |
| C | 0.272853 | 0.407774 | 0.502505 |
| C | 0.727157 | 0.592229 | 0.497475 |
| C | 0.441127 | 0.206044 | 0.491001 |
| C | 0.558876 | 0.793963 | 0.508978 |
| N | 0.376530 | 0.346228 | 0.287719 |
| N | 0.623475 | 0.653777 | 0.712278 |
| O | 0.553467 | 0.832224 | 0.166774 |
| O | 0.446532 | 0.167764 | 0.833262 |
| O | 0.614800 | 0.596446 | 0.117708 |
| O | 0.385188 | 0.403550 | 0.882348 |
| O | 0.848508 | 0.194168 | 0.992763 |
| O | 0.151469 | 0.805801 | 0.007283 |
| O | 0.102547 | 0.450445 | 0.842799 |
| O | 0.897436 | 0.549561 | 0.157223 |
| O | 0.912872 | 0.383938 | 0.749467 |
| O | 0.087145 | 0.616050 | 0.250538 |
| O | 0.364454 | 0.664683 | 0.157375 |
| O | 0.635528 | 0.335294 | 0.842677 |
| O | 0.359722 | 0.004824 | 0.292682 |
| O | 0.640288 | 0.995172 | 0.707310 |
| O | 0.169428 | 0.889055 | 0.499536 |
| O | 0.830594 | 0.110982 | 0.500393 |
| O | 0.358817 | 0.953672 | 0.051699 |
| O | 0.641178 | 0.046300 | 0.948352 |
| O | 0.548232 | 0.790574 | 0.942214 |
| O | 0.451771 | 0.209402 | 0.057838 |
| O | 0.144893 | 0.869111 | 0.278367 |
| O | 0.855124 | 0.130872 | 0.721609 |
| O | 0.712643 | 0.333972 | 0.150126 |
| O | 0.287340 | 0.666022 | 0.849907 |
| O | 0.880114 | 0.149566 | 0.220994 |
| O | 0.119881 | 0.850445 | 0.778999 |
| O | 0.014743 | 0.636268 | 0.676927 |
| O | 0.985270 | 0.363744 | 0.323047 |
| O | 0.854682 | 0.543440 | 0.906733 |
| O | 0.145307 | 0.456552 | 0.093301 |
| O | 0.642911 | 0.077557 | 0.196949 |
| O | 0.357080 | 0.922419 | 0.803071 |
| O | 0.118098 | 0.104472 | 0.337196 |

---

Supplementary Material (ESI) for *PCCP*  
This journal is © the Owner Societies 2008

---

|    |          |          |          |
|----|----------|----------|----------|
| O  | 0.881929 | 0.895564 | 0.662755 |
| O  | 0.842161 | 0.854826 | 0.017831 |
| O  | 0.157819 | 0.145163 | 0.982201 |
| Al | 0.212008 | 0.772107 | 0.157257 |
| Al | 0.787993 | 0.227902 | 0.842707 |
| Al | 0.773506 | 0.513068 | 0.077922 |
| Al | 0.226487 | 0.486940 | 0.922050 |
| Al | 0.047858 | 0.818963 | 0.655033 |
| Al | 0.952130 | 0.181043 | 0.344952 |
| Al | 0.499223 | 0.022092 | 0.132897 |
| Al | 0.500773 | 0.977924 | 0.867072 |
| P  | 0.970770 | 0.501415 | 0.793979 |
| P  | 0.029230 | 0.498591 | 0.206000 |
| P  | 0.522824 | 0.725407 | 0.093373 |
| P  | 0.477170 | 0.274600 | 0.906643 |
| P  | 0.200171 | 0.965541 | 0.349735 |
| P  | 0.799835 | 0.034479 | 0.650238 |
| P  | 0.768697 | 0.186151 | 0.140876 |
| P  | 0.231292 | 0.813839 | 0.859110 |

---

**Figure S1**

Experimental (flat plate) X-ray powder diffraction pattern and simulated patterns (Cu-K $\alpha_1$  radiation) for the experimental (Broach) and optimized (Optfix) structures of calcined-dehydrated AIPO-14.

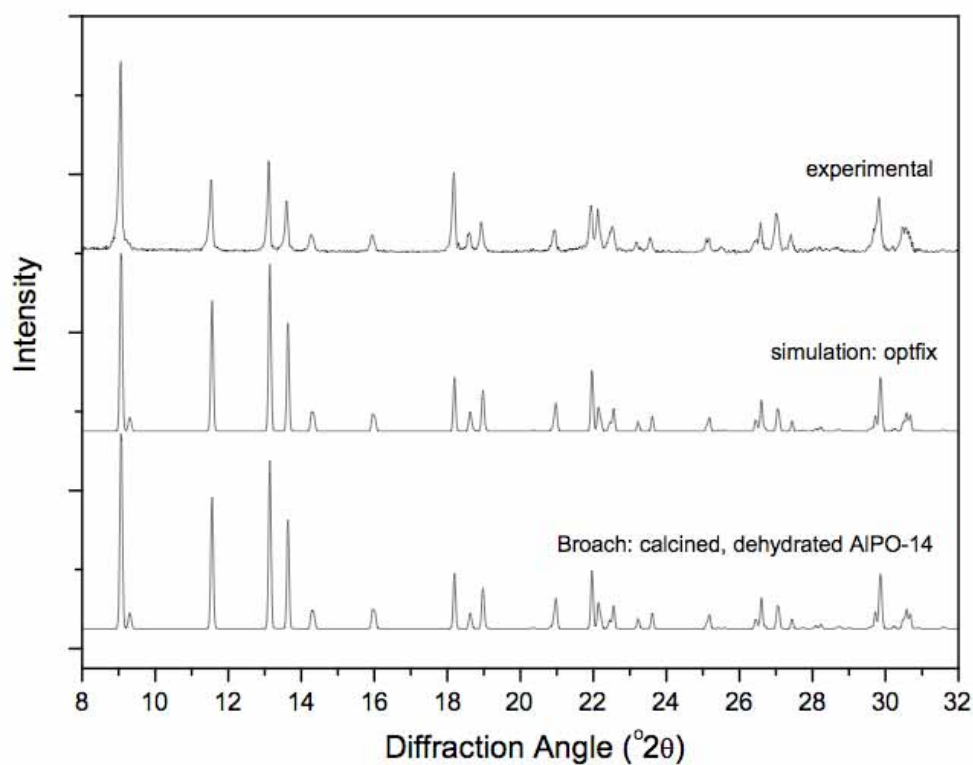

**Figure S2**

Experimental (flat plate) X-ray powder diffraction pattern and simulated patterns (Cu-K $\alpha_1$  radiation) for the experimental (Broach) and optimized (Optfix) structures of *ipa*-AlPO-14.

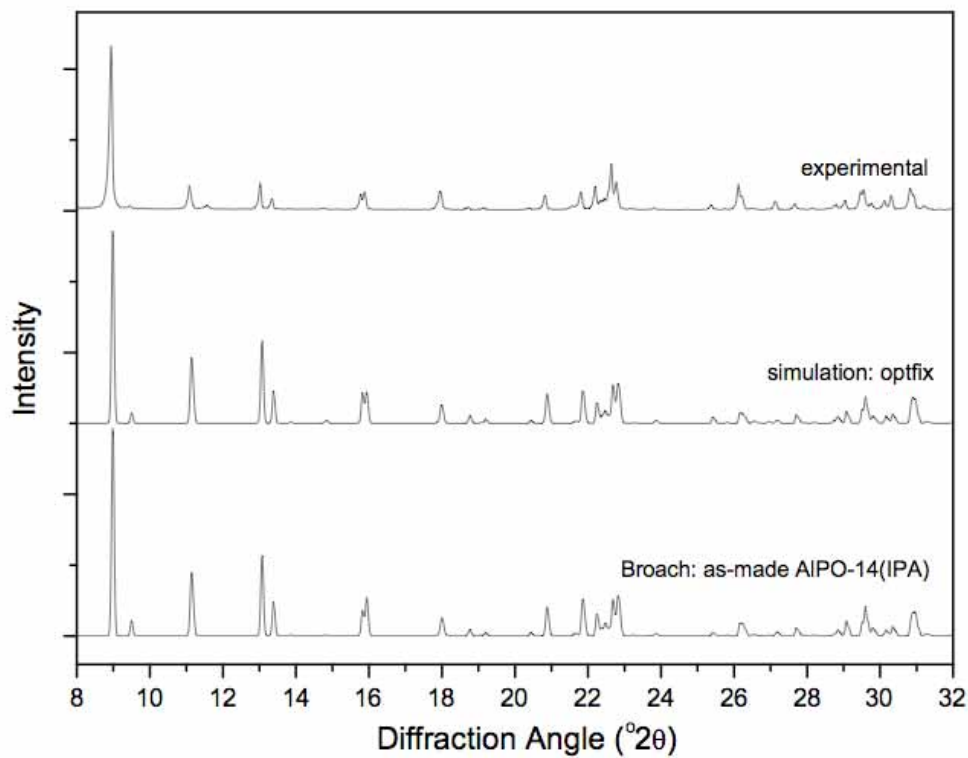

Supplement: b805681a.pdf [file b805681a.pdf]
